# Supplementary material for: Ethanol Solvothermal Treatment on Graphitic Carbon Nitride Materials for Enhancing Photocatalytic Hydrogen Evolution Performance
Source: MDPI journal article supplement (doi:10.3390/nano12020179), 2022-01-06
Supplement: s1 [file s1]

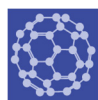

## Supplementary Materials

# Ethanol Solvothermal Treatment on Graphitic Carbon Nitride Materials for Enhancing Photocatalytic Hydrogen Evolution Performance

Phuong Anh Nguyen, Thi Kim Anh Nguyen, Duc Quang Dao and Eun Woo Shin \*

School of Chemical Engineering, University of Ulsan, Daehakro 93, Nam-gu, Ulsan 44610, Korea;  
anhphuong.nguyen1150@gmail.com (P.A.N.); nguyenthikimanhnb@gmail.com (T.K.A.N.);  
quangdao.ys@gmail.com (D.Q.D.)

\* Correspondence: ewshin@ulsan.ac.kr; Tel.: +82-52-259-2253

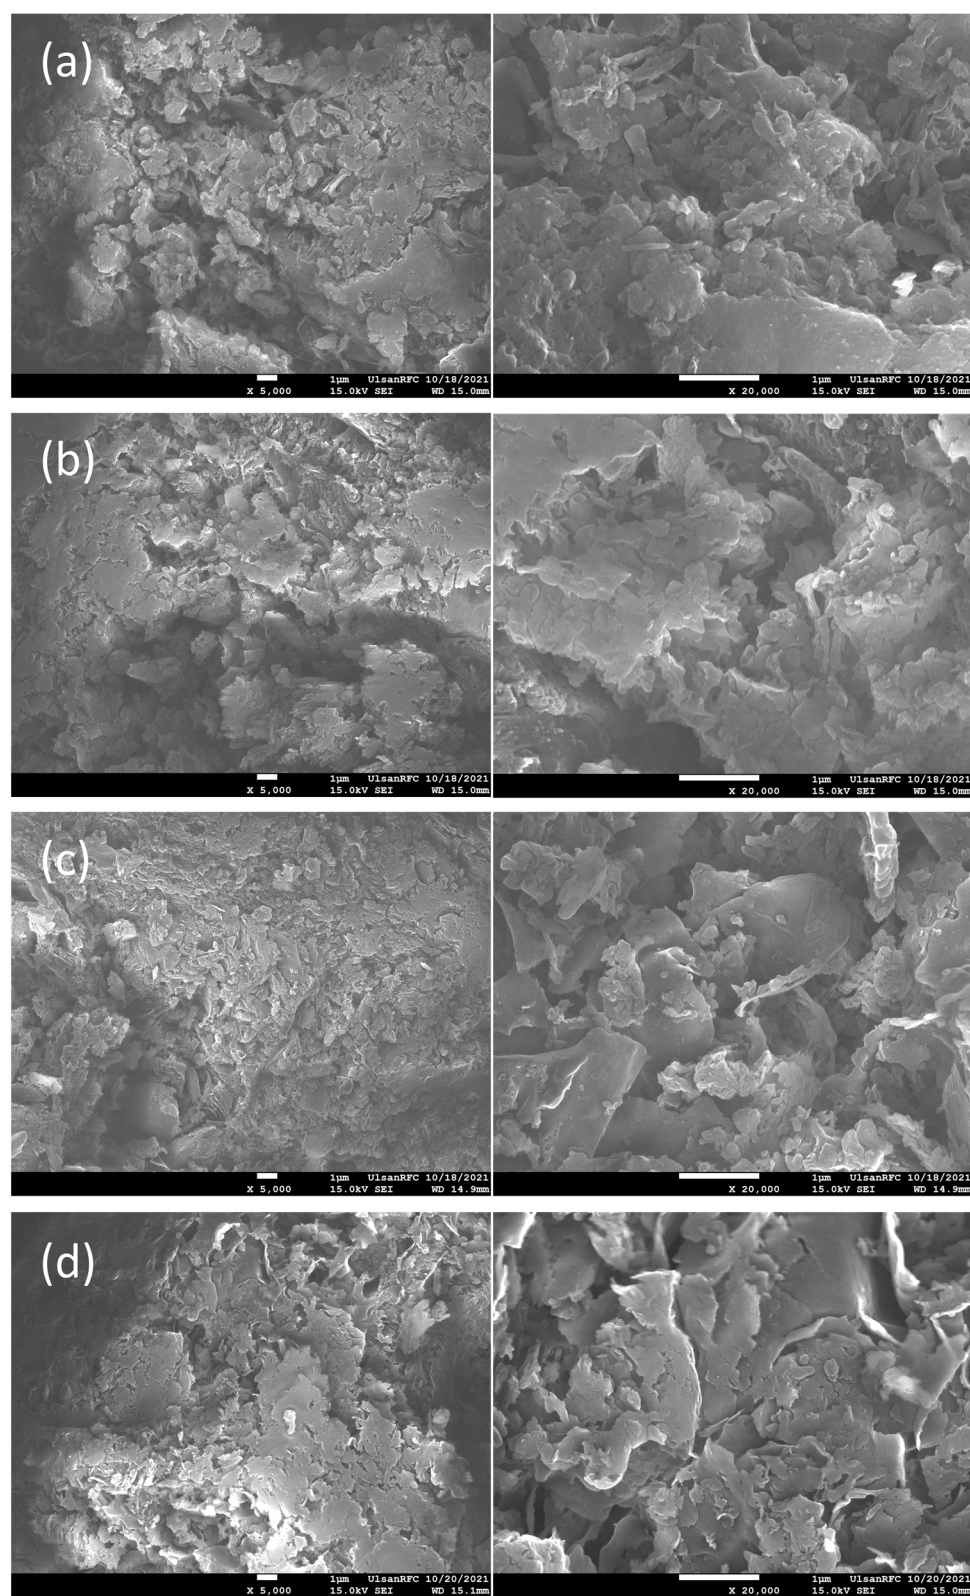

**Figure S1.** FE-SEM images of (a) Pt/CN-140, (b) Pt/CN-160, (c) Pt/CN-180, and (d) Pt/CN-220 photocatalysts.

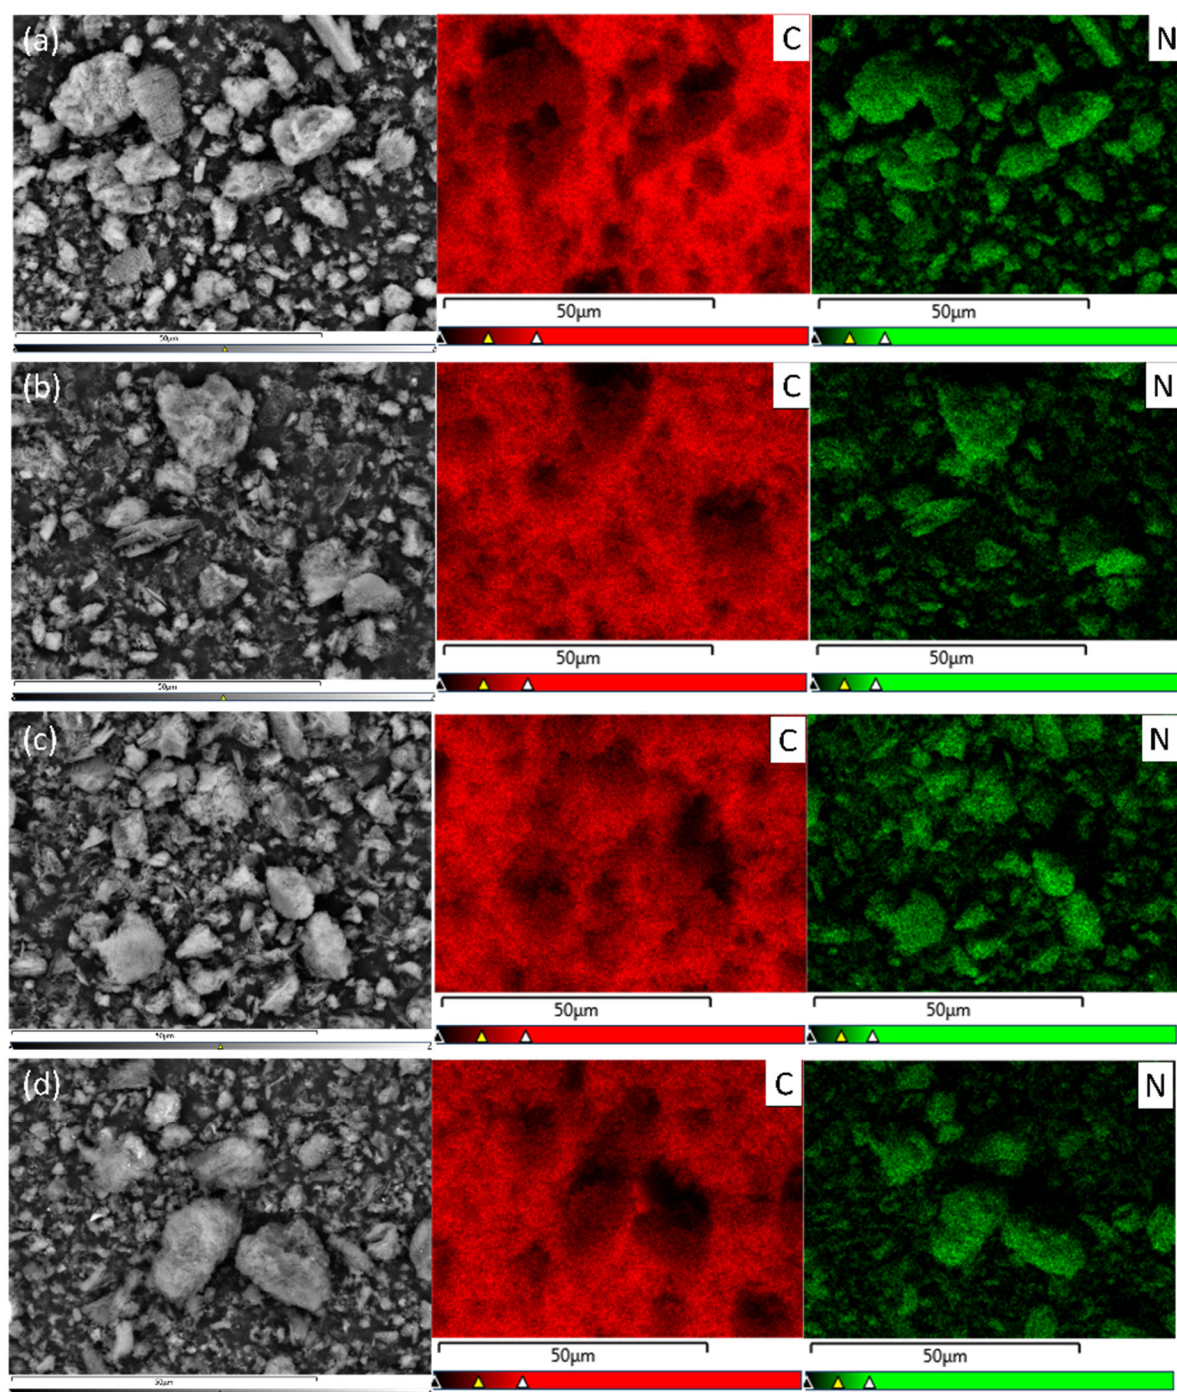

**Figure S2.** SEM images of (a) Pt/CN-140, (b) Pt/CN-160, (c) Pt/CN-180, and (d) Pt/CN-220 photocatalysts and the corresponding EDS elemental mappings of C, and N.

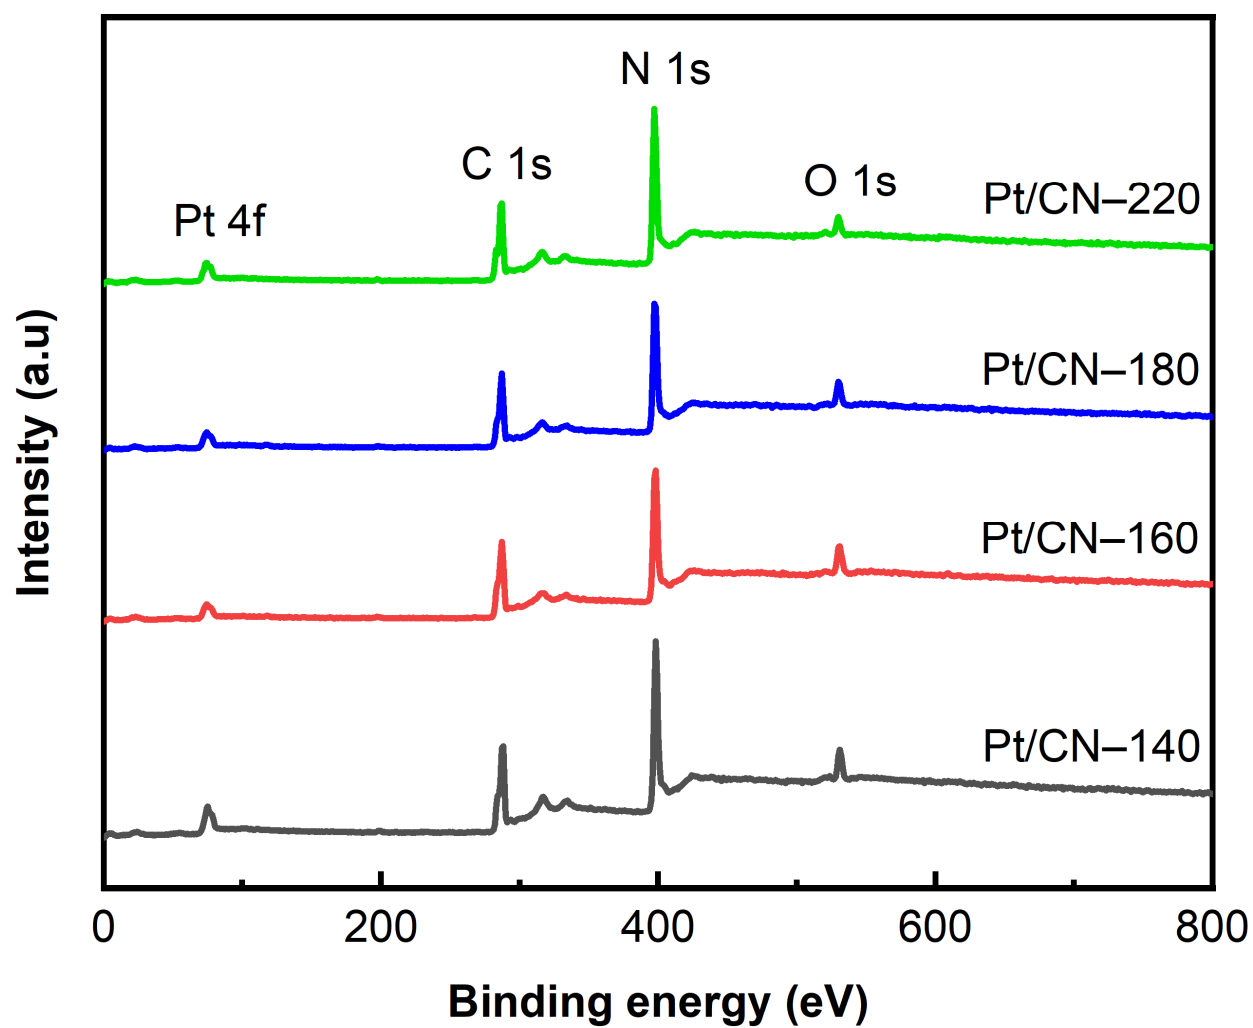

Figure S3. XPS survey spectra of Pt/CN photocatalysts.
